# Supplementary material for: The nature of the bonding in symmetrical pincer palladacycles
Source: Royal Society of Chemistry journal article supplement (doi:10.1039/c5dt00031a), 2015-01-01
Supplement: c5dt00031a1.pdf [file c5dt00031a1.pdf]

## Supporting information

# The Nature of the Bonding in Symmetrical Pincer Palladacycles

Sarote Boonseng, Gavin W. Roffe, John Spencer and Hazel Cox

Department of Chemistry, School of Life Sciences, University of Sussex, Falmer, Brighton,  
East Sussex, BN1 9QJ, UK

### CONTENT OF SUPPORTING INFORMATION

|                                                                                                                | <b>Page</b> |
|----------------------------------------------------------------------------------------------------------------|-------------|
| <b>S1.</b> Cartesian coordinates and calculated energies of PdCl <sub>2</sub> optimised at PBE                 | <b>2</b>    |
| <b>S2.</b> Cartesian coordinates and calculated energies of HCl optimised at PBE                               | <b>2</b>    |
| <b>S3.</b> Cartesian coordinates and calculated energies of PdNCN pathway optimised at PBE                     | <b>2</b>    |
| <b>S4.</b> Cartesian coordinates and calculated energies of PdSCS pathway optimised at PBE                     | <b>9</b>    |
| <b>S5.</b> Cartesian coordinates and calculated energies of PdPCP pathway optimised at PBE                     | <b>14</b>   |
| <b>S6.</b> Cartesian coordinates and calculated Gibbs free energies optimised at ωB97XD for formation reaction | <b>21</b>   |

### S1. Cartesian coordinates and calculated energies of PdCl<sub>2</sub> optimised at PBE

|    |            |             |             |
|----|------------|-------------|-------------|
| Pd | 0.00000000 | 0.00000000  | 0.60390400  |
| Cl | 0.00000000 | 1.69348600  | -0.81704600 |
| Cl | 0.00000000 | -1.69348600 | -0.81704600 |

Optimization using PBE/6-31+G(d,p)[SDD]

- Energy = -1047.9039066 au
- Zero-point energy correction = 0.001923 au
- Thermal correction to Gibbs free energy = -0.027367 au

Single point energy using  $\omega$ B97XD/6-311++G(2df,2p)[SDD]

- Energy = -1048.3424475 au

### S2. Cartesian coordinates and calculated energies of HCl optimised PBE

|    |            |            |             |
|----|------------|------------|-------------|
| Cl | 0.00000000 | 0.00000000 | 0.07185200  |
| H  | 0.00000000 | 0.00000000 | -1.22149200 |

Optimization using PBE/6-31+G(d,p)[SDD]

- Energy = -460.5940103 au
- Zero-point energy correction = 0.006599 au
- Thermal correction to Gibbs free energy = -0.011299 au

Single point energy using  $\omega$ B97XD/6-311++G(2df,2p)[SDD]

- Energy = -460.8184718 au

### S3. Cartesian coordinates and calculated energies of PdNCN pathway optimised at PBE

#### (1) Ligand

|   |             |             |             |
|---|-------------|-------------|-------------|
| N | -3.14034600 | -0.91474800 | -0.05035200 |
| N | 3.45058400  | -0.39650700 | -0.02567400 |
| C | -1.26877500 | 0.68460100  | 0.35343900  |
| C | -1.02601100 | 2.06390100  | 0.24231700  |
| H | -1.83590000 | 2.77336000  | 0.44713000  |
| C | 0.24640700  | 2.53467100  | -0.12553000 |
| H | 0.42590700  | 3.61171600  | -0.20647700 |
| C | 1.28165700  | 1.63172000  | -0.39734600 |
| H | 2.27863900  | 1.98759200  | -0.67601100 |
| C | 1.05507800  | 0.24286700  | -0.30110400 |
| C | -2.62271800 | 0.16252800  | 0.80109600  |
| H | -2.53106800 | -0.24915100 | 1.82430300  |
| H | -3.34205600 | 1.01710100  | 0.86882000  |
| C | -4.29683400 | -1.56126300 | 0.56271200  |
| H | -5.16310100 | -0.86861900 | 0.70151100  |
| H | -4.02023900 | -1.96626000 | 1.55053600  |
| H | -4.63090800 | -2.39924000 | -0.07122700 |
| C | -3.45796900 | -0.43696400 | -1.39505500 |

|   |             |             |             |
|---|-------------|-------------|-------------|
| H | -4.27329900 | 0.32750100  | -1.39759500 |
| H | -3.77975000 | -1.28531000 | -2.02105300 |
| H | -2.56379600 | 0.01323600  | -1.85376200 |
| C | 2.16287100  | -0.74011200 | -0.63925600 |
| H | 2.31710300  | -0.74401000 | -1.73525600 |
| H | 1.83487200  | -1.77344600 | -0.36348600 |
| C | 4.53577300  | -1.19044500 | -0.59426800 |
| H | 4.42125700  | -2.28652900 | -0.40740800 |
| H | 5.49605200  | -0.87097300 | -0.15646600 |
| H | 4.58501500  | -1.03187400 | -1.68454200 |
| C | 3.41027300  | -0.52993300 | 1.42960300  |
| H | 3.23002100  | -1.58241800 | 1.75945800  |
| H | 2.60791700  | 0.10165500  | 1.84193400  |
| H | 4.36957900  | -0.19496700 | 1.85717100  |
| C | -0.21722300 | -0.21344300 | 0.07969000  |
| H | -0.41309900 | -1.28935700 | 0.15681100  |

Optimization using PBE/6-31+G(d,p)[SDD]

- Energy = -578.0689059 au
- Zero-point energy correction = 0.294541 au
- Thermal correction to Gibbs free energy = 0.251441 au

Single point energy using  $\omega$ B97XD/6-311++G(2df,2p)[SDD]

- Energy = -578.7956829 au

## (2) Int1

|   |             |             |             |
|---|-------------|-------------|-------------|
| C | -0.73257000 | 0.86596400  | -0.59331300 |
| C | -1.31871400 | 1.83037600  | 1.97979000  |
| C | 0.20282900  | 1.71028400  | 0.08395700  |
| C | -0.10969200 | 2.18807700  | 1.38330500  |
| C | -2.23737100 | 0.99694100  | 1.30759800  |
| C | -1.96529500 | 0.51338700  | 0.02509800  |
| C | 1.42791900  | 2.19371900  | -0.68066700 |
| C | 3.10171500  | 0.83438800  | -1.93056100 |
| C | 3.45682500  | 1.33450400  | 0.43084800  |
| C | -2.91569800 | -0.42785000 | -0.68241300 |
| C | -5.12129800 | -1.41241600 | -0.64846900 |
| C | -4.87576400 | 0.97143100  | -0.92609400 |
| H | 0.59039100  | 2.85491300  | 1.89737600  |
| H | -1.55967300 | 2.20196800  | 2.98056000  |
| H | -3.18918500 | 0.72199900  | 1.77168400  |
| H | 1.16960600  | 2.38373900  | -1.73507300 |
| H | 1.84525900  | 3.12620600  | -0.25987500 |
| H | 3.70937700  | 1.71005900  | -2.23225100 |
| H | 2.33678000  | 0.63203300  | -2.69401800 |
| H | 3.73973800  | -0.05505000 | -1.82726000 |
| H | 4.08265500  | 2.20698500  | 0.15709300  |
| H | 4.07642300  | 0.43299700  | 0.53726600  |

|    |             |             |             |
|----|-------------|-------------|-------------|
| H  | 2.94835300  | 1.52607800  | 1.38669600  |
| H  | -2.60737300 | -1.44896500 | -0.38403400 |
| H  | -2.75362800 | -0.36303400 | -1.78793000 |
| H  | -5.15126300 | -1.62843000 | -1.74376300 |
| H  | -6.15741100 | -1.25764000 | -0.30468800 |
| H  | -4.71516700 | -2.29765200 | -0.13317800 |
| H  | -4.89117800 | 0.92328200  | -2.04248800 |
| H  | -4.28290400 | 1.85189400  | -0.62925300 |
| H  | -5.90995000 | 1.12038400  | -0.57437000 |
| H  | -0.59912400 | 0.64846000  | -1.66086900 |
| Pd | 1.13889600  | -0.47031800 | 0.03714600  |
| Cl | -0.25499200 | -2.08460700 | 0.91678300  |
| Cl | 2.87751700  | -1.98797500 | 0.00731100  |
| N  | 2.44211300  | 1.09108100  | -0.62773300 |
| N  | -4.31799700 | -0.23601700 | -0.32004100 |

Optimization using PBE/6-31+G(d,p)[SDD]

- Energy = -1626.0455495 au
- Zero-point energy correction = 0.299702 au
- Thermal correction to Gibbs free energy = 0.249572 au

Single point energy using  $\omega$ B97XD/6-311++G(2df,2p)[SDD]

- Energy = -1627.2261216 au

### (3) TS1

|   |             |             |             |
|---|-------------|-------------|-------------|
| C | -0.39440200 | 0.85988800  | -0.19544200 |
| C | -1.88363100 | 3.25998500  | -0.28759100 |
| C | 0.22609800  | 2.09580500  | -0.53421400 |
| C | -0.50892400 | 3.28722800  | -0.57992000 |
| C | -2.48277500 | 2.06618000  | 0.12592100  |
| C | -1.75182100 | 0.85758100  | 0.21052400  |
| C | 1.71596100  | 2.05019400  | -0.72320400 |
| C | 3.72101600  | 0.77701000  | -0.12308700 |
| C | 2.24147600  | 1.53549900  | 1.64836600  |
| C | -2.43153300 | -0.34739300 | 0.84884200  |
| C | -4.54199600 | -1.37450300 | 1.42065600  |
| C | -4.06362100 | -0.85127000 | -0.88283100 |
| H | -0.01318900 | 4.23240900  | -0.82805000 |
| H | -2.47405700 | 4.17999400  | -0.33967400 |
| H | -3.53948500 | 2.03468600  | 0.41183500  |
| H | 1.98727000  | 1.69812100  | -1.73400200 |
| H | 2.19702100  | 3.03586100  | -0.56186900 |
| H | 4.29486500  | 1.72239800  | -0.06392700 |
| H | 3.76437000  | 0.37226300  | -1.14343700 |
| H | 4.13481100  | 0.02731300  | 0.56323300  |
| H | 2.88843400  | 2.42738500  | 1.76272700  |
| H | 2.59626700  | 0.73248100  | 2.30959700  |
| H | 1.20569200  | 1.79405900  | 1.90453100  |

|    |             |             |             |
|----|-------------|-------------|-------------|
| H  | -2.36739900 | -0.20742400 | 1.94563100  |
| H  | -1.86989200 | -1.28075300 | 0.62901800  |
| H  | -4.15894800 | -2.42143100 | 1.36008700  |
| H  | -5.61797100 | -1.39254400 | 1.17988500  |
| H  | -4.42890100 | -1.02684200 | 2.46133700  |
| H  | -3.67489600 | -1.87128300 | -1.10704000 |
| H  | -3.55838700 | -0.13771800 | -1.55362100 |
| H  | -5.14235900 | -0.83137700 | -1.11044300 |
| H  | -0.33073900 | -0.59838000 | -1.19345400 |
| N  | 2.30332400  | 1.04831000  | 0.24171900  |
| N  | -3.85614900 | -0.45749900 | 0.51257400  |
| Pd | 1.03728900  | -0.62563100 | -0.02597700 |
| Cl | -0.42485400 | -2.08720200 | -1.41322100 |
| Cl | 2.67114200  | -2.21533200 | 0.55759800  |

Optimization using PBE/6-31+G(d,p)[SDD]

- Energy = -1626.0009458 au
- Zero-point energy correction = 0.293387 au
- Thermal correction to Gibbs free energy = 0.244363 au

Single point energy using  $\omega$ B97XD/6-311++G(2df,2p)[SDD]

- Energy = -1627.174838 au

#### (4) Int2---HCl

|   |             |             |             |
|---|-------------|-------------|-------------|
| C | -0.39722800 | 0.95321000  | -0.09591800 |
| C | -1.91622900 | 3.35095600  | -0.33180800 |
| C | 0.20249300  | 2.18531200  | -0.48447200 |
| C | -0.53920100 | 3.36854100  | -0.60776400 |
| C | -2.50834700 | 2.16816700  | 0.12193800  |
| C | -1.76602400 | 0.97112700  | 0.26782100  |
| C | 1.68678800  | 2.13783000  | -0.70712400 |
| C | 3.67237900  | 0.79458200  | -0.21546200 |
| C | 2.28250600  | 1.55449500  | 1.62196000  |
| C | -2.47862400 | -0.20829400 | 0.91131000  |
| C | -4.53638100 | -1.47546800 | 1.10246800  |
| C | -3.72441300 | -0.86256600 | -1.08062900 |
| H | -0.04619200 | 4.30072700  | -0.90740400 |
| H | -2.51264300 | 4.26288500  | -0.43313700 |
| H | -3.57163500 | 2.14719300  | 0.38551900  |
| H | 1.93227400  | 1.82262800  | -1.73647500 |
| H | 2.18533000  | 3.11084700  | -0.51910800 |
| H | 4.27067700  | 1.72499100  | -0.15559400 |
| H | 3.67101400  | 0.41115900  | -1.24475000 |
| H | 4.09278600  | 0.01918500  | 0.43738600  |
| H | 2.96170800  | 2.42408200  | 1.72495200  |
| H | 2.63630200  | 0.73113000  | 2.25797200  |
| H | 1.26560400  | 1.84101500  | 1.92010800  |
| H | -2.65840300 | 0.03477900  | 1.97609500  |

|    |             |             |             |
|----|-------------|-------------|-------------|
| H  | -1.81621600 | -1.10247100 | 0.92182000  |
| H  | -4.04009900 | -2.47596500 | 1.12637600  |
| H  | -5.54578300 | -1.60563500 | 0.67823500  |
| H  | -4.64169800 | -1.12260500 | 2.14167100  |
| H  | -3.22489700 | -1.86183700 | -1.24983100 |
| H  | -3.17617700 | -0.09822800 | -1.65312500 |
| H  | -4.73891800 | -0.95888900 | -1.50174200 |
| H  | -1.49239900 | -2.10481600 | -1.12743500 |
| N  | 2.27530600  | 1.09151000  | 0.20430000  |
| N  | -3.79661200 | -0.49072800 | 0.31917700  |
| Pd | 0.97006300  | -0.54037200 | -0.01039800 |
| Cl | -0.27822400 | -2.49956700 | -0.80855700 |
| Cl | 2.66700600  | -2.23430800 | 0.26494000  |

Optimization using PBE/6-31+G(d,p)[SDD]

- Energy = -1626.0077763 au
- Zero-point energy correction = 0.296399 au
- Thermal correction to Gibbs free energy = 0.247384 au

Single point energy using  $\omega$ B97XD/6-311++G(2df,2p)[SDD]

- Energy = -1627.1900992 au

## (5) Int2

|   |             |             |             |
|---|-------------|-------------|-------------|
| C | 0.38528600  | 0.94569700  | -0.07647800 |
| C | 1.84661900  | 3.32058900  | -0.19956000 |
| C | -0.25280700 | 2.16815600  | 0.22679000  |
| C | 0.48361900  | 3.36234500  | 0.15671000  |
| C | 2.48032500  | 2.09843600  | -0.49000400 |
| C | 1.74359500  | 0.90098700  | -0.43349600 |
| C | -1.68072300 | 2.02154800  | 0.67867500  |
| C | -3.34292400 | 0.21379600  | 0.98562000  |
| C | -2.76086700 | 0.94742200  | -1.26198500 |
| C | 2.27613500  | -0.48338400 | -0.73666400 |
| C | 3.82069700  | -2.27161500 | -0.26188700 |
| C | 2.96161200  | -0.90477000 | 1.54789300  |
| H | 0.00925100  | 4.32492200  | 0.38104900  |
| H | 2.41711000  | 4.25278800  | -0.25342700 |
| H | 3.54277800  | 2.07900200  | -0.75685600 |
| H | -1.72496400 | 1.93395600  | 1.77876900  |
| H | -2.33937000 | 2.86252100  | 0.38393600  |
| H | -4.16591300 | 0.95484700  | 1.03055300  |
| H | -2.95290600 | 0.02776500  | 1.99593900  |
| H | -3.70372900 | -0.73652100 | 0.56847800  |
| H | -3.63071100 | 1.63435600  | -1.23065700 |
| H | -3.06424400 | -0.02007800 | -1.68559100 |
| H | -1.96494500 | 1.38545300  | -1.87957000 |
| H | 2.61172400  | -0.57336000 | -1.78593900 |
| H | 1.35794900  | -1.19305500 | -0.66485400 |

|    |             |             |             |
|----|-------------|-------------|-------------|
| H  | 3.04732900  | -3.06482700 | -0.14357900 |
| H  | 4.69238800  | -2.54092400 | 0.35572800  |
| H  | 4.13619600  | -2.24927200 | -1.31757300 |
| H  | 2.06283800  | -1.53511000 | 1.75862500  |
| H  | 2.73066000  | 0.12885800  | 1.84471800  |
| H  | 3.80113500  | -1.27223400 | 2.15839000  |
| N  | -2.24667400 | 0.73054300  | 0.12253500  |
| N  | 3.32788100  | -0.95302300 | 0.13480800  |
| Pd | -0.69244100 | -0.68153400 | -0.05773600 |
| Cl | -1.78483200 | -2.78861300 | -0.14690500 |

Optimization using PBE/6-31+G(d,p)[SDD]

- Energy = -1165.4097808 au
- Zero-point energy correction = 0.285928 au
- Thermal correction to Gibbs free energy = 0.238276 au

Single point energy using  $\omega$ B97XD/6-311++G(2df,2p)[SDD]

- Energy = -1166.3584581 au

## (6) TS2

|    |             |             |             |
|----|-------------|-------------|-------------|
| C  | 1.90393400  | 3.17460000  | -0.30665600 |
| C  | 0.34952100  | 0.86817900  | -0.04211700 |
| C  | 1.71169700  | 0.74456800  | -0.36891900 |
| C  | 2.48820600  | 1.91202500  | -0.50899600 |
| Pd | -0.81884100 | -0.69692700 | 0.00236900  |
| C  | 0.54377200  | 3.29238800  | 0.04290100  |
| C  | -0.23670300 | 2.13391200  | 0.18511700  |
| C  | -1.67290100 | 2.07669700  | 0.63010800  |
| C  | -3.42829300 | 0.36688100  | 0.98246300  |
| C  | -2.78730700 | 0.99164200  | -1.28270300 |
| C  | 2.18465800  | -0.67655700 | -0.60123500 |
| C  | 3.90959400  | -0.37597100 | 1.22281800  |
| C  | 3.99366400  | -2.29422400 | -0.31858500 |
| N  | 3.22829800  | -1.19784100 | 0.24256600  |
| N  | -2.30046400 | 0.79882700  | 0.11456800  |
| H  | 2.44434300  | -0.81252200 | -1.67301300 |
| H  | 1.23847700  | -1.33166200 | -0.48205500 |
| H  | 3.54971600  | 1.84210100  | -0.77404000 |
| H  | -1.72674600 | 2.02866000  | 1.73223300  |
| H  | -2.28398100 | 2.94103500  | 0.30204400  |
| H  | 0.10473800  | 4.28489900  | 0.19808100  |
| H  | 2.51064300  | 4.07731800  | -0.42572500 |
| H  | 4.50956300  | -2.84367900 | 0.48679300  |
| H  | 3.31888300  | -3.00201200 | -0.82879200 |
| H  | 4.76227200  | -1.95861600 | -1.05408500 |
| H  | 4.34211000  | -1.02900000 | 2.00086400  |
| H  | 4.74009700  | 0.23483600  | 0.79672800  |
| H  | 3.20006900  | 0.31060600  | 1.70692500  |

|    |             |             |             |
|----|-------------|-------------|-------------|
| H  | -3.05676600 | 0.19576500  | 2.00231600  |
| H  | -4.21450100 | 1.14809400  | 0.99406700  |
| H  | -3.83263700 | -0.57762800 | 0.59286300  |
| H  | -3.14067300 | 0.02763100  | -1.67421600 |
| H  | -3.61676500 | 1.72766800  | -1.28811500 |
| H  | -1.96058500 | 1.35970300  | -1.90554600 |
| Cl | -1.96914400 | -2.76801800 | -0.06596700 |

Optimization using PBE/6-31+G(d,p)[SDD]

- Energy = -1165.3968021 au
- Zero-point energy correction = 0.284798 au
- Thermal correction to Gibbs free energy = 0.237593 au

Single point energy using  $\omega$ B97XD/6-311++G(2df,2p)[SDD]

- Energy = -1166.3440431 au

## (7) Product

|    |             |             |             |
|----|-------------|-------------|-------------|
| Pd | 0.68754100  | -0.00011800 | -0.00004600 |
| Cl | 3.11142200  | -0.00018900 | -0.00007000 |
| N  | 0.37409200  | 2.11717300  | 0.03083500  |
| N  | 0.37359300  | -2.11722100 | -0.03083500 |
| C  | -1.24271500 | 0.00007300  | 0.00000000  |
| C  | -1.92563000 | 1.21349400  | -0.20287800 |
| C  | -3.33152600 | 1.21344500  | -0.19024200 |
| H  | -3.89524700 | 2.14209500  | -0.33804700 |
| C  | -4.02372200 | 0.00043600  | -0.00002700 |
| H  | -5.11793900 | 0.00057800  | -0.00006400 |
| C  | -3.33185400 | -1.21275600 | 0.19020000  |
| H  | -3.89581300 | -2.14126000 | 0.33801300  |
| C  | -1.92596400 | -1.21317000 | 0.20285400  |
| C  | -1.02123500 | 2.38439700  | -0.50384900 |
| H  | -0.91742400 | 2.49898400  | -1.59765200 |
| H  | -1.38944500 | 3.35134400  | -0.10532300 |
| C  | 1.38130900  | 2.87581200  | -0.75457400 |
| H  | 1.18447400  | 3.96433800  | -0.68240700 |
| H  | 1.33457600  | 2.55772300  | -1.80601800 |
| H  | 2.38190200  | 2.63672200  | -0.36725800 |
| C  | 0.45643600  | 2.52430400  | 1.46185900  |
| H  | 0.31953600  | 3.62141600  | 1.55351300  |
| H  | 1.44251300  | 2.23849500  | 1.85534400  |
| H  | -0.32705300 | 2.00595100  | 2.03243500  |
| C  | -1.02175900 | -2.38423900 | 0.50382500  |
| H  | -1.39005800 | -3.35116500 | 0.10531900  |
| H  | -0.91800200 | -2.49884700 | 1.59764100  |
| C  | 0.45602100  | -2.52470200 | -1.46174700 |
| H  | 0.31922700  | -3.62183500 | -1.55312200 |
| H  | 1.44206100  | -2.23887700 | -1.85529600 |
| H  | -0.32754100 | -2.00657500 | -2.03244600 |



|   |            |             |            |
|---|------------|-------------|------------|
| C | 1.38069300 | -2.87571500 | 0.75489400 |
| H | 1.18338700 | -3.96421300 | 0.68353900 |
| H | 1.33436900 | -2.55679800 | 1.80609800 |
| H | 2.38129200 | -2.63737600 | 0.36716200 |

Optimization using PBE/6-31+G(d,p)[SDD]

- Energy = -1165.4543999 au
- Zero-point energy correction = 0.288941 au
- Thermal correction to Gibbs free energy = 0.244536 au

Single point energy using  $\omega$ B97XD/6-311++G(2df,2p)[SDD]

- Energy = -1166.4077768 au

#### S4. Cartesian coordinates and calculated energies of PdSCS pathway optimised at PBE

##### (1) Ligand

|   |             |             |             |
|---|-------------|-------------|-------------|
| C | -0.00015800 | -0.15328600 | -0.00003300 |
| C | 0.00016800  | 2.64246800  | -0.00011600 |
| C | 1.15695900  | 0.53477900  | -0.40959000 |
| C | 1.14793700  | 1.94309500  | -0.39974700 |
| C | -1.14773900 | 1.94339900  | 0.39954300  |
| C | -1.15708900 | 0.53506100  | 0.40947300  |
| C | 2.39077600  | -0.22582100 | -0.82684900 |
| C | 4.78794700  | -1.51447700 | -0.17580000 |
| C | -2.39110000 | -0.22520400 | 0.82684300  |
| C | -4.78792500 | -1.51442200 | 0.17606100  |
| H | 2.04602000  | 2.49022900  | -0.70585600 |
| H | 0.00031100  | 3.73679700  | -0.00017600 |
| H | -2.04571200 | 2.49070300  | 0.70568100  |
| H | 2.11643400  | -1.17845400 | -1.31230600 |
| H | 2.99197000  | 0.36761200  | -1.53730300 |
| H | 5.31414100  | -0.87784900 | -0.90586800 |
| H | 4.41720100  | -2.42439100 | -0.67575100 |
| H | 5.50038100  | -1.81056500 | 0.60910000  |
| H | -2.99236500 | 0.36873500  | 1.53681500  |
| H | -2.11690400 | -1.17751100 | 1.31304000  |
| H | -5.31429900 | -0.87744200 | 0.90569600  |
| H | -4.41714800 | -2.42400200 | 0.67659200  |
| H | -5.50020600 | -1.81103600 | -0.60877300 |
| H | -0.00024800 | -1.24963000 | -0.00001300 |
| S | 3.43597000  | -0.60662900 | 0.65092400  |
| S | -3.43585900 | -0.60691800 | -0.65089800 |

Optimization using PBE/6-31+G(d,p)[SDD]

- Energy = -1185.0063729 au
- Zero-point energy correction = 0.208627 au
- Thermal correction to Gibbs free energy = 0.164334 au

Single point energy using  $\omega$ B97XD/6-311++G(2df,2p)[SDD]

- Energy = -1185.8931399 au

## (2) Int1

|    |             |             |             |
|----|-------------|-------------|-------------|
| C  | 0.81154000  | 1.11479800  | 0.38493900  |
| C  | 1.24427600  | 3.14552900  | -1.50754000 |
| C  | -0.09395800 | 2.21470800  | 0.28893400  |
| C  | 0.11700900  | 3.21324200  | -0.67030800 |
| C  | 2.16549100  | 2.09793700  | -1.38263700 |
| C  | 1.98262700  | 1.08005800  | -0.42561000 |
| C  | -1.29375000 | 2.24565700  | 1.19910800  |
| C  | -3.11668200 | 0.20579600  | 2.07119200  |
| C  | 3.01104400  | -0.00817600 | -0.29004600 |
| C  | 3.54965100  | -2.27734400 | 1.28861600  |
| H  | -0.58630400 | 4.04745300  | -0.75716800 |
| H  | 1.41366400  | 3.93001200  | -2.25162300 |
| H  | 3.05579200  | 2.07809100  | -2.01939200 |
| H  | -1.02935400 | 1.97528900  | 2.23464500  |
| H  | -1.80610900 | 3.21968200  | 1.19433000  |
| H  | -3.80669100 | 0.92108900  | 2.54426200  |
| H  | -2.30407300 | -0.07663300 | 2.75592900  |
| H  | -3.65676100 | -0.69597100 | 1.74832000  |
| H  | 3.93526400  | 0.27775200  | -0.81799000 |
| H  | 2.59133800  | -0.91773100 | -0.77070900 |
| H  | 4.42354700  | -2.54669800 | 0.67532800  |
| H  | 2.63350600  | -2.71096100 | 0.85846400  |
| H  | 3.69749700  | -2.66975500 | 2.30627700  |
| H  | 0.78231600  | 0.45355500  | 1.26595800  |
| S  | -2.44439000 | 0.94788200  | 0.53911500  |
| S  | 3.38810400  | -0.46323900 | 1.45568100  |
| Pd | -0.87037900 | -0.52964300 | -0.31899400 |
| Cl | -2.62538800 | -2.00661800 | -0.60897700 |
| Cl | 0.58602900  | -2.04450600 | -1.27040900 |

Optimization using PBE/6-31+G(d,p)[SDD]

- Energy = -2232.9752296 au
- Zero-point energy correction = 0.212403 au
- Thermal correction to Gibbs free energy = 0.160866 au

Single point energy using  $\omega$ B97XD/6-311++G(2df,2p)[SDD]

- Energy = -2234.3164399 au

## (3) TS1

|   |             |            |            |
|---|-------------|------------|------------|
| C | 0.35091000  | 0.98468200 | 0.11159500 |
| C | 1.72157400  | 3.46231100 | 0.06326000 |
| C | -0.32819900 | 2.20778200 | 0.40654000 |
| C | 0.35404200  | 3.43179300 | 0.38397900 |

|    |             |             |             |
|----|-------------|-------------|-------------|
| C  | 2.37758900  | 2.28370200  | -0.30353700 |
| C  | 1.70514100  | 1.04015400  | -0.31435700 |
| C  | -1.82122200 | 2.15197400  | 0.59441800  |
| C  | -4.07940800 | 0.51948000  | -0.09721500 |
| C  | 2.43327300  | -0.17848100 | -0.83622400 |
| C  | 4.56158900  | -1.96615700 | -0.81401600 |
| H  | -0.18256500 | 4.36300300  | 0.59528600  |
| H  | 2.26184400  | 4.41367500  | 0.05855500  |
| H  | 3.43036300  | 2.31175600  | -0.60429400 |
| H  | -2.12052700 | 1.72185500  | 1.56592900  |
| H  | -2.30768600 | 3.13177300  | 0.45852300  |
| H  | -4.75094800 | 1.38231800  | -0.22829300 |
| H  | -4.02343400 | 0.20363300  | 0.95366300  |
| H  | -4.41415900 | -0.33286800 | -0.70488100 |
| H  | 2.70981400  | -0.00368300 | -1.89287300 |
| H  | 1.78931600  | -1.07164500 | -0.80046900 |
| H  | 4.74440400  | -1.72642000 | -1.87433500 |
| H  | 3.84137500  | -2.79643200 | -0.73568600 |
| H  | 5.51125000  | -2.27796100 | -0.35354500 |
| H  | 0.45188100  | -0.27229400 | 1.12498300  |
| S  | -2.42643300 | 0.97890500  | -0.72333600 |
| S  | 3.98202600  | -0.50521900 | 0.11177800  |
| Pd | -0.95690400 | -0.65001000 | -0.06056700 |
| Cl | -2.44123700 | -2.42502900 | -0.41623900 |
| Cl | 0.59038000  | -1.71312800 | 1.58340200  |

Optimization using PBE/6-31+G(d,p)[SDD]

- Energy = -2232.9368068 au
- Zero-point energy correction = 0.205639 au
- Thermal correction to Gibbs free energy = 0.155914 au

Single point energy using  $\omega$ B97XD/6-311++G(2df,2p)[SDD]

- Energy = -2234.2710216 au

#### (4) Int2---HCl

|   |             |             |             |
|---|-------------|-------------|-------------|
| C | 0.25693900  | 1.14633800  | -0.01254200 |
| C | 1.46803000  | 3.73417600  | 0.16453800  |
| C | -0.49061000 | 2.30461000  | 0.35557000  |
| C | 0.10417700  | 3.57419600  | 0.44958900  |
| C | 2.20432000  | 2.62786600  | -0.27032100 |
| C | 1.61233000  | 1.34908500  | -0.38485600 |
| C | -1.97067800 | 2.13347100  | 0.57903500  |
| C | -4.03593200 | 0.21376200  | 0.12222200  |
| C | 2.45302000  | 0.24062100  | -0.96706900 |
| C | 4.27560700  | -1.90515100 | -0.56016900 |
| H | -0.50234600 | 4.44207900  | 0.73255300  |
| H | 1.93959400  | 4.71809000  | 0.24180000  |
| H | 3.25745400  | 2.75287500  | -0.54993500 |

|    |             |             |             |
|----|-------------|-------------|-------------|
| H  | -2.21071000 | 1.75106600  | 1.58639600  |
| H  | -2.54663300 | 3.05509700  | 0.39157000  |
| H  | -4.81100000 | 0.98358700  | -0.01764300 |
| H  | -3.88612900 | -0.02291800 | 1.18482700  |
| H  | -4.29579300 | -0.71139000 | -0.41085000 |
| H  | 3.12170700  | 0.61628700  | -1.75864900 |
| H  | 1.82393500  | -0.57006300 | -1.37081500 |
| H  | 4.86698200  | -1.53510300 | -1.41084000 |
| H  | 3.48892900  | -2.59206600 | -0.90916900 |
| H  | 4.94087000  | -2.43289200 | 0.13883200  |
| H  | 2.11556200  | -1.36858100 | 0.88579300  |
| S  | -2.48590700 | 0.82178400  | -0.62836900 |
| S  | 3.54286000  | -0.49746500 | 0.34712900  |
| Pd | -0.79692400 | -0.60374300 | -0.07366900 |
| Cl | -2.18895800 | -2.54570300 | -0.22628900 |
| Cl | 0.84670000  | -2.10234600 | 0.94974600  |

Optimization using PBE/6-31+G(d,p)[SDD]

- Energy = -2232.9653942 au
- Zero-point energy correction = 0.209021 au
- Thermal correction to Gibbs free energy = 0.160793 au

Single point energy using  $\omega$ B97XD/6-311++G(2df,2p)[SDD]

- Energy = -2234.3012196 au

## (5) Int2

|    |             |             |             |
|----|-------------|-------------|-------------|
| C  | -0.44046500 | 3.65539400  | -0.06476900 |
| C  | 0.17908800  | 0.90578200  | 0.05861200  |
| C  | -1.12583300 | 1.33256700  | 0.39209200  |
| C  | -1.40797100 | 2.71791300  | 0.31083100  |
| Pd | 0.73105200  | -1.01674600 | 0.13668100  |
| C  | 0.85962500  | 3.22511900  | -0.35699300 |
| C  | 1.17471000  | 1.85614400  | -0.29614800 |
| C  | 2.56757400  | 1.36779300  | -0.57694300 |
| C  | 3.99736100  | -1.10085300 | -0.38550800 |
| C  | -2.24770400 | 0.41789600  | 0.82010200  |
| C  | -4.48692100 | -1.09469100 | 0.11102500  |
| H  | -2.74826100 | 0.83409700  | 1.71257900  |
| H  | -1.87618600 | -0.59129800 | 1.05042500  |
| H  | -2.42370500 | 3.04848000  | 0.55417700  |
| H  | 2.68179700  | 0.98927000  | -1.60774500 |
| H  | 3.34255600  | 2.12505100  | -0.37564700 |
| H  | 1.63879800  | 3.94831200  | -0.62180200 |
| H  | -0.69325500 | 4.71872600  | -0.10954100 |
| H  | -3.87220200 | -2.00323300 | 0.21250100  |
| H  | -4.94944500 | -0.83489000 | 1.07744300  |
| H  | -5.28565700 | -1.28314600 | -0.62267300 |
| H  | 3.64053600  | -1.29301300 | -1.40768900 |

|    |             |             |             |
|----|-------------|-------------|-------------|
| H  | 4.96770000  | -0.57994500 | -0.39974100 |
| H  | 4.10679700  | -2.05264100 | 0.15457200  |
| Cl | -0.91056000 | -2.53280700 | -0.35404700 |
| S  | 2.79156700  | -0.08769100 | 0.54855100  |
| S  | -3.48501400 | 0.28168300  | -0.54600100 |

Optimization using PBE/6-31+G(d,p)[SDD]

- Energy = -1772.3496229 au
- Zero-point energy correction = 0.200103 au
- Thermal correction to Gibbs free energy = 0.152977 au

Single point energy using  $\omega$ B97XD/6-311++G(2df,2p)[SDD]

- Energy = -1773.4605087 au

## (6) TS2

|    |             |             |             |
|----|-------------|-------------|-------------|
| C  | -0.24490600 | 3.84286800  | -0.20435900 |
| C  | -0.32597100 | 1.02569300  | -0.14713900 |
| C  | 0.89385100  | 1.67791200  | -0.44968300 |
| C  | 0.90883800  | 3.08910700  | -0.46056900 |
| Pd | -0.36122000 | -0.96638500 | -0.20845100 |
| C  | -1.44708600 | 3.19059700  | 0.09433200  |
| C  | -1.49006900 | 1.78386400  | 0.13726400  |
| C  | -2.73943900 | 1.04391700  | 0.51618000  |
| C  | -3.32492200 | -1.70850200 | 1.00563600  |
| C  | 2.18430100  | 0.92873200  | -0.67343700 |
| C  | 4.16355700  | -0.70701400 | 0.45946000  |
| H  | 2.89699300  | 1.55139800  | -1.24077100 |
| H  | 2.02339300  | -0.01477600 | -1.22169000 |
| H  | 1.85727500  | 3.59524400  | -0.67318100 |
| H  | -2.80594300 | 0.87698100  | 1.60580300  |
| H  | -3.66796800 | 1.52662300  | 0.16947000  |
| H  | -2.35505000 | 3.76896000  | 0.29777400  |
| H  | -0.20467700 | 4.93553000  | -0.23563800 |
| H  | 4.70008500  | -1.01436300 | 1.37018500  |
| H  | 3.67740200  | -1.58937600 | 0.01222200  |
| H  | 4.88714400  | -0.26422900 | -0.24428700 |
| H  | -2.82880500 | -1.56332300 | 1.97548200  |
| H  | -4.40209200 | -1.48768500 | 1.07492400  |
| H  | -3.18405000 | -2.74509400 | 0.66745600  |
| Cl | 1.14162500  | -2.72075800 | -0.40478000 |
| S  | -2.58726400 | -0.62787300 | -0.27525700 |
| S  | 2.90888200  | 0.51085100  | 0.97813900  |

Optimization using PBE/6-31+G(d,p)[SDD]

- Energy = -1772.347369 au
- Zero-point energy correction = 0.199946 au
- Thermal correction to Gibbs free energy = 0.153997 au

Single point energy using  $\omega$ B97XD/6-311++G(2df,2p)[SDD]

- Energy = -1773.4583413 au

### (7) Product

|    |             |             |             |
|----|-------------|-------------|-------------|
| C  | 4.10519700  | -0.00012900 | -0.00001300 |
| C  | 1.27933700  | -0.00003300 | -0.00002100 |
| C  | 1.99733700  | -1.22282600 | -0.02884600 |
| C  | 3.40480300  | -1.21686000 | -0.00739600 |
| Pd | -0.71390500 | 0.00002400  | -0.00003400 |
| C  | 3.40488600  | 1.21665000  | 0.00741600  |
| C  | 1.99742000  | 1.22271100  | 0.02883700  |
| C  | 1.21495200  | 2.50797400  | 0.13224700  |
| C  | -1.54704400 | 3.21550600  | 0.51328900  |
| C  | 1.21478300  | -2.50803900 | -0.13227300 |
| C  | -1.54731500 | -3.21546500 | -0.51307100 |
| H  | 1.69299200  | -3.35107300 | 0.39375900  |
| H  | 1.05732700  | -2.79757600 | -1.18660700 |
| H  | 3.95802600  | -2.16298600 | -0.01032100 |
| H  | 1.05755600  | 2.79755000  | 1.18658000  |
| H  | 1.69319300  | 3.35097000  | -0.39381800 |
| H  | 3.95817400  | 2.16273800  | 0.01034500  |
| H  | 5.19924700  | -0.00016600 | -0.00001600 |
| H  | -2.57527500 | -2.88657000 | -0.29802800 |
| H  | -1.31762300 | -3.00674100 | -1.56780500 |
| H  | -1.42427900 | -4.28441300 | -0.28174900 |
| H  | -1.31757900 | 3.00635900  | 1.56798500  |
| H  | -1.42360700 | 4.28448900  | 0.28232900  |
| H  | -2.57508800 | 2.88707600  | 0.29795700  |
| Cl | -3.11635000 | 0.00007700  | -0.00004100 |
| S  | -0.47843100 | 2.22382700  | -0.58910700 |
| S  | -0.47854600 | -2.22376500 | 0.58914700  |

Optimization using PBE/6-31+G(d,p)[SDD]

- Energy = -1772.3949618 au
- Zero-point energy correction = 0.200995 au
- Thermal correction to Gibbs free energy = 0.156628 au

Single point energy using  $\omega$ B97XD/6-311++G(2df,2p)[SDD]

- Energy = -1773.5066915 au

## S5. Cartesian coordinates and calculated energies of PdPCP pathway optimised at PBE

### (1) Ligand

|   |             |             |            |
|---|-------------|-------------|------------|
| C | -0.01077400 | -0.10703900 | 0.01144500 |
| C | -0.01041700 | 2.65718200  | 0.39478300 |
| C | -1.14067900 | 0.50241100  | 0.59718700 |

|   |             |             |             |
|---|-------------|-------------|-------------|
| C | -1.12752700 | 1.89869100  | 0.77981800  |
| C | 1.10355000  | 2.03507300  | -0.18259800 |
| C | 1.11469300  | 0.63822700  | -0.38729000 |
| C | -2.34701800 | -0.31935500 | 0.98363000  |
| C | -4.80104400 | -1.63181100 | 0.36634500  |
| C | -3.96988200 | 0.60510200  | -1.19250400 |
| C | 2.31308600  | -0.04340500 | -1.00224500 |
| C | 4.92173900  | -1.17884300 | -0.88816100 |
| C | 3.19922500  | -1.38756900 | 1.37103400  |
| H | -1.99458200 | 2.39255300  | 1.23210100  |
| H | -0.01061600 | 3.74126600  | 0.54718000  |
| H | 1.97503200  | 2.63036700  | -0.47508900 |
| H | -2.04426500 | -1.20288300 | 1.57471400  |
| H | -3.03761600 | 0.27721500  | 1.60816200  |
| H | -5.25804900 | -0.87286000 | 1.02677300  |
| H | -4.53495100 | -2.51521800 | 0.96972300  |
| H | -5.54974200 | -1.95032400 | -0.37738100 |
| H | -4.49340200 | 1.19887600  | -0.42165400 |
| H | -4.67401000 | 0.38237100  | -2.01062300 |
| H | -3.14786400 | 1.20935100  | -1.60820900 |
| H | 2.65087100  | 0.50832900  | -1.89827900 |
| H | 2.05496800  | -1.06976800 | -1.32275200 |
| H | 4.42151900  | -2.10196600 | -1.23231500 |
| H | 5.81381700  | -1.45713500 | -0.30345400 |
| H | 5.26497400  | -0.61062200 | -1.76828600 |
| H | 2.84542800  | -2.30718400 | 0.87078400  |
| H | 2.37367100  | -0.96623100 | 1.96683000  |
| H | 4.01590800  | -1.65011500 | 2.06304400  |
| H | -0.01728200 | -1.19160700 | -0.15127700 |
| P | -3.28187600 | -0.99465000 | -0.51961800 |
| P | 3.80697500  | -0.10244400 | 0.15970700  |

Optimization using PBE/6-31+G(d,p)[SDD]

- Energy = -1151.0872461 au
- Zero-point energy correction = 0.280704 au
- Thermal correction to Gibbs free energy = 0.233553 au

Single point energy using  $\omega$ B97XD/6-311++G(2df,2p)[SDD]

- Energy = -1152.0670616 au

## (2) Int1

|   |             |            |             |
|---|-------------|------------|-------------|
| C | 0.63738400  | 1.06872900 | 0.14869100  |
| C | 1.23118000  | 3.49633900 | -1.12421000 |
| C | -0.19561500 | 2.20672900 | 0.36357500  |
| C | 0.10416800  | 3.40994100 | -0.28581200 |
| C | 2.06316300  | 2.38963000 | -1.30483600 |
| C | 1.80275200  | 1.15615200 | -0.66274500 |
| C | -1.42965700 | 2.08163800 | 1.22746400  |

|    |             |             |             |
|----|-------------|-------------|-------------|
| C  | -3.74150500 | 0.28692600  | 1.70303200  |
| C  | -3.37084400 | 1.51379500  | -0.92678200 |
| C  | 2.78013800  | 0.03179600  | -0.79922700 |
| C  | 4.92281700  | -1.58750600 | 0.07681400  |
| C  | 3.17970700  | -0.47728600 | 2.02230400  |
| H  | -0.53880300 | 4.28344200  | -0.13650100 |
| H  | 1.46038700  | 4.43950200  | -1.63010800 |
| H  | 2.95070500  | 2.47184300  | -1.94032600 |
| H  | -1.17303800 | 1.75075800  | 2.25082200  |
| H  | -1.98287400 | 3.03274600  | 1.30732700  |
| H  | -4.37206800 | 1.15881100  | 1.94438800  |
| H  | -3.25362000 | -0.08523100 | 2.61671800  |
| H  | -4.35680400 | -0.52286900 | 1.28317600  |
| H  | -4.07492600 | 2.28033200  | -0.56258700 |
| H  | -3.91995900 | 0.72142300  | -1.45838600 |
| H  | -2.64814700 | 1.96906300  | -1.62108900 |
| H  | 3.30909900  | 0.11493700  | -1.76474300 |
| H  | 2.27197600  | -0.94880600 | -0.76118800 |
| H  | 4.17545100  | -2.39773100 | 0.02180700  |
| H  | 5.67986200  | -1.84578100 | 0.83548900  |
| H  | 5.43719600  | -1.50659300 | -0.89472900 |
| H  | 2.52441200  | -1.34195700 | 1.81577800  |
| H  | 2.57463000  | 0.36430800  | 2.39671900  |
| H  | 3.89113800  | -0.74912000 | 2.81985700  |
| H  | 0.54163900  | 0.18484900  | 0.84169100  |
| Pd | -0.95875200 | -0.83313200 | -0.11666200 |
| Cl | 0.56231800  | -2.56560000 | -0.54829000 |
| Cl | -2.78035800 | -2.16747900 | -0.59468700 |
| P  | -2.46104800 | 0.73877000  | 0.46733400  |
| P  | 4.15510700  | 0.05797600  | 0.51955500  |

Optimization using PBE/6-31+G(d,p)[SDD]

- Energy = -2199.0783161 au
- Zero-point energy correction = 0.285002 au
- Thermal correction to Gibbs free energy = 0.230446 au

Single point energy using  $\omega$ B97XD/6-311++G(2df,2p)[SDD]

- Energy = -2200.5162586 au

### (3) TS1

|   |             |            |             |
|---|-------------|------------|-------------|
| C | 0.17027300  | 0.96354100 | 0.25118700  |
| C | 1.32859200  | 3.53907700 | 0.16301200  |
| C | -0.58183300 | 2.11880000 | 0.63658600  |
| C | 0.00217100  | 3.39298800 | 0.60224500  |
| C | 2.04794300  | 2.42689600 | -0.28958500 |
| C | 1.48473500  | 1.13154700 | -0.27444600 |
| C | -2.05580000 | 1.93179000 | 0.92731100  |
| C | -4.28172200 | 0.06791200 | 0.15309700  |



|    |             |             |             |
|----|-------------|-------------|-------------|
| C  | -2.74982700 | 1.45935700  | -1.91569500 |
| C  | 2.23530800  | -0.03890500 | -0.87651300 |
| C  | 4.46374400  | -1.66990500 | -1.46225500 |
| C  | 4.26512000  | -0.49001500 | 1.13189800  |
| H  | -0.58041700 | 4.27251600  | 0.89689000  |
| H  | 1.79057300  | 4.53116500  | 0.14258900  |
| H  | 3.06403500  | 2.55372500  | -0.67857600 |
| H  | -2.23686200 | 1.51843900  | 1.93741200  |
| H  | -2.63459300 | 2.86691800  | 0.82873600  |
| H  | -4.99573000 | 0.90613600  | 0.08835900  |
| H  | -4.27087900 | -0.34514000 | 1.17255700  |
| H  | -4.57201900 | -0.74026000 | -0.53499100 |
| H  | -3.54796100 | 2.22053200  | -1.88985000 |
| H  | -2.98597000 | 0.70296200  | -2.67961800 |
| H  | -1.79018800 | 1.93335100  | -2.17034300 |
| H  | 2.06814200  | -0.03081500 | -1.97146400 |
| H  | 1.82887600  | -0.99783200 | -0.50789000 |
| H  | 3.84653000  | -2.48149800 | -1.03817000 |
| H  | 5.52738100  | -1.92152900 | -1.32080600 |
| H  | 4.27684100  | -1.60775500 | -2.54693500 |
| H  | 3.68218800  | -1.39042300 | 1.38744500  |
| H  | 3.91256700  | 0.34338500  | 1.76086500  |
| H  | 5.32897700  | -0.66126900 | 1.36515200  |
| H  | 0.33281800  | -0.19063900 | 1.24172800  |
| Pd | -0.94466400 | -0.81549300 | 0.00920500  |
| Cl | 0.72509100  | -1.54698800 | 1.93818200  |
| Cl | -2.21903600 | -2.69562900 | -0.52173900 |
| P  | -2.59330100 | 0.62760200  | -0.28522300 |
| P  | 4.11563800  | -0.01715400 | -0.66591800 |

Optimization using PBE/6-31+G(d,p)[SDD]

- Energy = -2199.0454577 au
- Zero-point energy correction = 0.277989 au
- Thermal correction to Gibbs free energy = 0.224200 au

Single point energy using  $\omega$ B97XD/6-311++G(2df,2p)[SDD]

- Energy = -2200.4740076 au

#### (4) Int2---HCl

|   |             |             |             |
|---|-------------|-------------|-------------|
| C | 0.17524900  | 1.20072800  | -0.20313700 |
| C | 1.17153700  | 3.81218800  | 0.09198400  |
| C | -0.67800300 | 2.24239000  | 0.24521600  |
| C | -0.17454200 | 3.54717000  | 0.39186300  |
| C | 2.01185200  | 2.78472200  | -0.36146100 |
| C | 1.52541400  | 1.47050800  | -0.52513300 |
| C | -2.11060000 | 1.86974200  | 0.55769600  |
| C | -3.77345000 | -0.63787000 | 0.35173700  |
| C | -2.97936600 | 0.80200400  | -2.07387900 |

|    |             |             |             |
|----|-------------|-------------|-------------|
| C  | 2.41900800  | 0.36046200  | -1.03476300 |
| C  | 4.33520400  | -1.71017400 | -0.69776700 |
| C  | 2.67187300  | -0.94486600 | 1.48521800  |
| H  | -0.82872700 | 4.35340800  | 0.74157700  |
| H  | 1.56508700  | 4.82687200  | 0.20609900  |
| H  | 3.05923800  | 2.99997600  | -0.60127300 |
| H  | -2.23764300 | 1.61830000  | 1.62771100  |
| H  | -2.84695700 | 2.65078700  | 0.29770200  |
| H  | -4.70098500 | -0.04061100 | 0.33899100  |
| H  | -3.50507100 | -0.89677300 | 1.38732500  |
| H  | -3.91531100 | -1.56912600 | -0.21750400 |
| H  | -3.95693200 | 1.30848800  | -2.00471700 |
| H  | -3.07202600 | -0.09524900 | -2.70431800 |
| H  | -2.23884600 | 1.47975100  | -2.52401300 |
| H  | 2.93248100  | 0.67331800  | -1.96253700 |
| H  | 1.81520300  | -0.53926800 | -1.30380000 |
| H  | 3.49995200  | -2.38509900 | -0.95576300 |
| H  | 5.04360100  | -2.25499300 | -0.05249500 |
| H  | 4.87096800  | -1.43101700 | -1.61982300 |
| H  | 1.93352700  | -1.64521800 | 1.04589300  |
| H  | 2.13315200  | -0.16226900 | 2.04194700  |
| H  | 3.29140600  | -1.50401700 | 2.20550600  |
| H  | -0.71120100 | -0.85871100 | 1.63941000  |
| Pd | -0.44719700 | -0.70363200 | -0.44618700 |
| Cl | -0.98407100 | -0.83692500 | 2.96810000  |
| Cl | -0.75310300 | -2.98936500 | -0.80580800 |
| P  | -2.39913500 | 0.31016300  | -0.40134800 |
| P  | 3.75960500  | -0.16993600 | 0.18896700  |

Optimization using PBE/6-31+G(d,p)[SDD]

- Energy = -2199.0631014 au
- Zero-point energy correction = 0.280035 au
- Thermal correction to Gibbs free energy = 0.224534 au

Single point energy using  $\omega$ B97XD/6-311++G(2df,2p)[SDD]

- Energy = -2200.4972212 au

## (5) Int2

|    |             |             |             |
|----|-------------|-------------|-------------|
| C  | 0.99729200  | 3.80375300  | -0.07602700 |
| C  | 0.07277600  | 1.14232900  | -0.07508800 |
| C  | 1.39355000  | 1.42593900  | -0.49819600 |
| C  | 1.84418700  | 2.76226300  | -0.48438800 |
| Pd | -0.48619400 | -0.78840900 | -0.09974900 |
| C  | -0.31788100 | 3.52669200  | 0.33011100  |
| C  | -0.78367900 | 2.19907400  | 0.33305000  |
| C  | -2.18086400 | 1.81942500  | 0.77629200  |
| C  | -3.69293800 | -0.75945500 | 1.08902200  |
| C  | -3.29788300 | 0.38774100  | -1.56316000 |

|    |             |             |             |
|----|-------------|-------------|-------------|
| C  | 2.29841600  | 0.29855300  | -0.94543700 |
| C  | 2.51876700  | -0.84079300 | 1.65996000  |
| C  | 4.19204900  | -1.76429700 | -0.45024600 |
| H  | 2.82440800  | 0.56936900  | -1.87920900 |
| H  | 1.70134400  | -0.61492400 | -1.17838300 |
| H  | 2.86775600  | 2.98480200  | -0.80728100 |
| H  | -2.24659500 | 1.72327300  | 1.87676100  |
| H  | -2.96140400 | 2.53416700  | 0.45841500  |
| H  | -0.97803500 | 4.34256800  | 0.64544600  |
| H  | 1.36074400  | 4.83599000  | -0.08081500 |
| H  | 3.35217400  | -2.45065600 | -0.65740600 |
| H  | 4.72615300  | -1.55388100 | -1.39136600 |
| H  | 4.89987500  | -2.26531200 | 0.23016800  |
| H  | 1.76400000  | -1.55251900 | 1.26424100  |
| H  | 3.12858100  | -1.37014500 | 2.41085700  |
| H  | 1.99710400  | -0.01377600 | 2.16627300  |
| H  | -3.29581800 | -0.87644200 | 2.10823300  |
| H  | -4.64898700 | -0.20937500 | 1.11885600  |
| H  | -3.84690300 | -1.76297300 | 0.66369500  |
| H  | -3.41764400 | -0.58367300 | -2.06614300 |
| H  | -4.28635000 | 0.85589000  | -1.41730000 |
| H  | -2.66691600 | 1.03555300  | -2.18977300 |
| Cl | -0.79853200 | -3.11261200 | -0.17300500 |
| P  | -2.46395400 | 0.13008200  | 0.05580400  |
| P  | 3.62420300  | -0.16035300 | 0.32278900  |

Optimization using PBE/6-31+G(d,p)[SDD]

- Energy = -1738.4601217 au
- Zero-point energy correction = 0.271868 au
- Thermal correction to Gibbs free energy = 0.220168 au

Single point energy using  $\omega$ B97XD/6-311++G(2df,2p)[SDD]

- Energy = -1739.6695216 au

## (6) TS2

|    |             |             |             |
|----|-------------|-------------|-------------|
| C  | -4.12017800 | 0.87633400  | -0.10146200 |
| C  | -1.34323400 | 0.28098800  | 0.00605900  |
| C  | -2.30904100 | -0.74518900 | 0.17253300  |
| C  | -3.68370000 | -0.44170700 | 0.09581000  |
| Pd | 0.61241600  | -0.18090400 | -0.01740800 |
| C  | -3.17755400 | 1.90437800  | -0.24370100 |
| C  | -1.80056200 | 1.61348500  | -0.20671700 |
| C  | -0.77413500 | 2.70567900  | -0.43136700 |
| C  | 2.15585500  | 2.80798000  | -0.95826900 |
| C  | 1.20130700  | 2.65164700  | 1.78362200  |
| C  | -1.88929900 | -2.16018000 | 0.48969800  |
| C  | 0.39532100  | -2.46855700 | -1.76572100 |
| C  | 1.02319900  | -2.83638500 | 1.37340300  |

|    |             |             |             |
|----|-------------|-------------|-------------|
| H  | -2.65175400 | -2.87441200 | 0.13262200  |
| H  | -1.84446700 | -2.30384100 | 1.58797900  |
| H  | -4.41985300 | -1.24750300 | 0.20295700  |
| H  | -0.69224100 | 2.95714200  | -1.50618000 |
| H  | -1.01100900 | 3.64416200  | 0.10290000  |
| H  | -3.51364900 | 2.93624700  | -0.39862800 |
| H  | -5.19044800 | 1.10048700  | -0.14691000 |
| H  | 2.03276000  | -2.78740300 | 0.93690600  |
| H  | 0.91976300  | -1.98439000 | 2.06107100  |
| H  | 0.90202100  | -3.78119300 | 1.92586800  |
| H  | 1.49578800  | -2.42246800 | -1.73102500 |
| H  | 0.08104700  | -3.30352600 | -2.41118100 |
| H  | 0.02537500  | -1.52222100 | -2.18996500 |
| H  | 1.96526500  | 2.56354400  | -2.01409200 |
| H  | 2.15494600  | 3.90260500  | -0.82033200 |
| H  | 3.13373800  | 2.38496600  | -0.68182400 |
| H  | 2.14851600  | 2.22042200  | 2.14237200  |
| H  | 1.26926000  | 3.75291200  | 1.78421800  |
| H  | 0.38940700  | 2.32806000  | 2.45198000  |
| Cl | 2.99248100  | -0.57902500 | -0.16368800 |
| P  | 0.87014600  | 2.01624300  | 0.08800100  |
| P  | -0.22385700 | -2.85153800 | -0.02990700 |

Optimization using PBE/6-31+G(d,p)[SDD]

- Energy = -1738.4345589 au
- Zero-point energy correction = 0.272112 au
- Thermal correction to Gibbs free energy = 0.222278 au

Single point energy using  $\omega$ B97XD/6-311++G(2df,2p)[SDD]

- Energy = -1739.6364842 au

## (7) Product

|    |             |             |             |
|----|-------------|-------------|-------------|
| Pd | -0.00017600 | -0.69978800 | -0.00018000 |
| P  | -2.27102100 | -0.43061400 | -0.02746100 |
| P  | 2.27074200  | -0.43201700 | 0.02775500  |
| Cl | -0.00113700 | -3.10173800 | -0.00046800 |
| C  | 0.00046300  | 1.33180700  | -0.00002000 |
| C  | 1.19575300  | 2.06426900  | -0.26349700 |
| C  | 1.18788900  | 3.47245900  | -0.25030900 |
| C  | 0.00130900  | 4.17703700  | -0.00029400 |
| C  | -1.18569000 | 3.47319800  | 0.24992600  |
| C  | -1.19438100 | 2.06503800  | 0.26343200  |
| C  | -2.46838200 | 1.31016700  | 0.59876800  |
| C  | 2.46938700  | 1.30865000  | -0.59847100 |
| H  | -2.59392600 | 1.23428100  | 1.69617700  |
| H  | -3.37564900 | 1.80155600  | 0.20308700  |
| H  | 2.59530000  | 1.23268000  | -1.69584000 |
| H  | 3.37681800  | 1.79946300  | -0.20244900 |

|   |             |             |             |
|---|-------------|-------------|-------------|
| H | 2.11515500  | 4.02267900  | -0.44848300 |
| H | 0.00161200  | 5.27151100  | -0.00043700 |
| H | -2.11261000 | 4.02402700  | 0.44802000  |
| C | 3.06033200  | -0.45554900 | 1.69436000  |
| H | 2.55954200  | 0.28509200  | 2.33638400  |
| H | 2.92223300  | -1.45318300 | 2.13938600  |
| H | 4.13720500  | -0.22419900 | 1.63220600  |
| C | 3.35625800  | -1.50796500 | -0.99670100 |
| H | 4.41714400  | -1.21928700 | -0.91039500 |
| H | 3.21919000  | -2.54861700 | -0.66296200 |
| H | 3.03766500  | -1.44714200 | -2.04860500 |
| C | -3.06137900 | -0.45388600 | -1.69369700 |
| H | -2.92365600 | -1.45154000 | -2.13879400 |
| H | -4.13817700 | -0.22231900 | -1.63109800 |
| H | -2.56069900 | 0.28666800  | -2.33591200 |
| C | -3.35662000 | -1.50589100 | 0.99760300  |
| H | -4.41735900 | -1.21647700 | 0.91194600  |
| H | -3.22046200 | -2.54661000 | 0.66369600  |
| H | -3.03735000 | -1.44536300 | 2.04931600  |

Optimization using PBE/6-31+G(d,p)[SDD]

- Energy = -1738.511456 au
- Zero-point energy correction = 0.273466 au
- Thermal correction to Gibbs free energy = 0.224647 au

Single point energy using  $\omega$ B97XD/6-311++G(2df,2p)[SDD]

- Energy = -1739.7196009 au

**S6.** Cartesian coordinates and calculated Gibbs free energies optimised at  $\omega$ B97XD for formation reaction

**(1) PdCl<sub>2</sub>**

|    |            |             |             |
|----|------------|-------------|-------------|
| Pd | 0.00000000 | 0.00000000  | 0.61284400  |
| Cl | 0.00000000 | 1.66139700  | -0.82914200 |
| Cl | 0.00000000 | -1.66139700 | -0.82914200 |

Optimization using  $\omega$ B97XD/6-31+G(d,p)[SDD]

- Energy = -1048.2719833 au
- Zero-point energy correction = 0.002065 au
- Thermal correction to Gibbs free energy = -0.027061 au

Single point energy using  $\omega$ B97XD/6-311++G(2df,2p)[SDD]

- Energy = -1048.3428069 au

**(2) HCl**

|    |            |            |            |
|----|------------|------------|------------|
| Cl | 0.00000000 | 0.00000000 | 0.07121100 |
|----|------------|------------|------------|

H 0.00000000 0.00000000 -1.21058200

Optimization using  $\omega$ B97XD/6-31+G(d,p)[SDD]

- Energy = -460.784617 au
- Zero-point energy correction = 0.006813 au
- Thermal correction to Gibbs free energy = -0.011068 au

Single point energy using  $\omega$ B97XD/6-311++G(2df,2p)[SDD]

- Energy = -460.8185939 au

### (3) Ligand of PdNCN

|   |             |             |             |
|---|-------------|-------------|-------------|
| N | -3.09887800 | -0.91345800 | -0.07517800 |
| N | 3.41521500  | -0.38651000 | -0.01378100 |
| C | -1.24140900 | 0.65375800  | 0.38703700  |
| C | -1.02320700 | 2.02619800  | 0.30524000  |
| H | -1.82890800 | 2.71542300  | 0.54536400  |
| C | 0.22374400  | 2.52077400  | -0.08326700 |
| H | 0.38512800  | 3.59292200  | -0.14337100 |
| C | 1.25408500  | 1.64570200  | -0.40130600 |
| H | 2.23056000  | 2.02100400  | -0.69285000 |
| C | 1.04906800  | 0.26263300  | -0.33328200 |
| C | -2.57523900 | 0.09807300  | 0.83385300  |
| H | -2.45517900 | -0.37329600 | 1.81705600  |
| H | -3.29408000 | 0.93169700  | 0.96596200  |
| C | -4.25976400 | -1.57333300 | 0.49337600  |
| H | -5.10114100 | -0.87569400 | 0.67330300  |
| H | -3.99484100 | -2.04224600 | 1.44577800  |
| H | -4.60777200 | -2.35629700 | -0.18649700 |
| C | -3.40234600 | -0.35608500 | -1.38255100 |
| H | -4.19144900 | 0.41978200  | -1.33602500 |
| H | -3.74274400 | -1.15196000 | -2.05091900 |
| H | -2.50596900 | 0.09407300  | -1.81574200 |
| C | 2.16695600  | -0.68676700 | -0.70320000 |
| H | 2.35811100  | -0.60794500 | -1.78040600 |
| H | 1.84043500  | -1.72863900 | -0.51277000 |
| C | 4.51165200  | -1.16658700 | -0.55728000 |
| H | 4.36512900  | -2.25676000 | -0.42696000 |
| H | 5.44461000  | -0.88841400 | -0.05855700 |
| H | 4.62321900  | -0.96200000 | -1.62629400 |
| C | 3.29622200  | -0.58275200 | 1.42144600  |
| H | 3.06958400  | -1.63499000 | 1.68313700  |
| H | 2.49979400  | 0.04934700  | 1.82150500  |
| H | 4.23413700  | -0.30206200 | 1.90877500  |
| C | -0.19477200 | -0.21750000 | 0.06518200  |
| H | -0.37293200 | -1.28884900 | 0.12074300  |

Optimization using  $\omega$ B97XD/6-31+G(d,p)[SDD]

- Energy = -578.6633177 au

- Zero-point energy correction = 0.306576 au
  - Thermal correction to Gibbs free energy = 0.264023 au
- Single point energy using  $\omega$ B97XD/6-311++G(2df,2p)[SDD]
- Energy = -578.8000493 au

#### (4) Product of PdNCN

|    |             |             |             |
|----|-------------|-------------|-------------|
| Pd | 0.69653100  | 0.00000300  | 0.00000800  |
| Cl | 3.11519800  | -0.00000100 | -0.00002200 |
| N  | 0.35915300  | -2.11842900 | -0.03315300 |
| N  | 0.35914600  | 2.11843100  | 0.03316300  |
| C  | -1.23202100 | 0.00000000  | 0.00000500  |
| C  | -1.90948400 | -1.19684600 | 0.22116500  |
| C  | -3.30425500 | -1.19959300 | 0.21057000  |
| H  | -3.86038300 | -2.11980000 | 0.37308100  |
| C  | -3.99138400 | -0.00000800 | -0.00001400 |
| H  | -5.07710600 | -0.00001100 | -0.00002100 |
| C  | -3.30425900 | 1.19958000  | -0.21058900 |
| H  | -3.86038900 | 2.11978400  | -0.37310800 |
| C  | -1.90948700 | 1.19684100  | -0.22116500 |
| C  | -1.01103300 | -2.36706000 | 0.52612500  |
| H  | -0.89793800 | -2.46271300 | 1.61107400  |
| H  | -1.39691100 | -3.32522200 | 0.14881700  |
| C  | 1.36530600  | -2.88863300 | 0.72246200  |
| H  | 1.12975400  | -3.96217300 | 0.68653000  |
| H  | 1.37953700  | -2.54731300 | 1.75880700  |
| H  | 2.34950100  | -2.70334500 | 0.29151700  |
| C  | 0.40159500  | -2.52363900 | -1.45502000 |
| H  | 0.25260300  | -3.60973900 | -1.54475500 |
| H  | 1.37180400  | -2.25220800 | -1.87428800 |
| H  | -0.38530500 | -2.00439000 | -2.00474700 |
| C  | -1.01104000 | 2.36705900  | -0.52612100 |
| H  | -1.39692000 | 3.32521900  | -0.14881300 |
| H  | -0.89794000 | 2.46271200  | -1.61107000 |
| C  | 0.40158300  | 2.52365200  | 1.45502600  |
| H  | 0.25259100  | 3.60975200  | 1.54475300  |
| H  | 1.37179100  | 2.25222500  | 1.87430100  |
| H  | -0.38531800 | 2.00440600  | 2.00475500  |
| C  | 1.36530200  | 2.88862800  | -0.72245500 |
| H  | 1.12975400  | 3.96216900  | -0.68653100 |
| H  | 1.37953500  | 2.54730000  | -1.75879800 |
| H  | 2.34949600  | 2.70333900  | -0.29150700 |

Optimization using  $\omega$ B97XD/6-31+G(d,p)[SDD]

- Energy = -1166.2379582 au
- Zero-point energy correction = 0.300958 au
- Thermal correction to Gibbs free energy = 0.257485 au

Single point energy using  $\omega$ B97XD/6-311++G(2df,2p)[SDD]

- Energy = -1166.4124004 au

### (5) Ligand of PdSCS

|   |             |             |             |
|---|-------------|-------------|-------------|
| C | -0.00000400 | -0.12442500 | 0.00001900  |
| C | 0.00000100  | 2.65021200  | -0.00031200 |
| C | 1.14796500  | 0.55930800  | -0.40283200 |
| C | 1.14039800  | 1.95585500  | -0.39347300 |
| C | -1.14039800 | 1.95595300  | 0.39301800  |
| C | -1.14797000 | 0.55940900  | 0.40271100  |
| C | 2.37975000  | -0.20162400 | -0.81567200 |
| C | 4.71876500  | -1.53113100 | -0.17804400 |
| C | -2.37975800 | -0.20142300 | 0.81572400  |
| C | -4.71875000 | -1.53111400 | 0.17838800  |
| H | 2.03236200  | 2.49908300  | -0.69348100 |
| H | 0.00000100  | 3.73572900  | -0.00044800 |
| H | -2.03236200 | 2.49925600  | 0.69289100  |
| H | 2.10398000  | -1.12591100 | -1.33326400 |
| H | 2.99302800  | 0.40161200  | -1.49228900 |
| H | 5.25301900  | -0.88436800 | -0.87924800 |
| H | 4.33740600  | -2.40982700 | -0.70527700 |
| H | 5.41777300  | -1.86202700 | 0.59264300  |
| H | -2.99303800 | 0.40197200  | 1.49219800  |
| H | -2.10399100 | -1.12559000 | 1.33353500  |
| H | -5.25299900 | -0.88421600 | 0.87947200  |
| H | -4.33738000 | -2.40970300 | 0.70579100  |
| H | -5.41776700 | -1.86216600 | -0.59222400 |
| H | -0.00000700 | -1.21241000 | 0.00014900  |
| S | 3.38093100  | -0.63454100 | 0.65399000  |
| S | -3.38093200 | -0.63468100 | -0.65384100 |

Optimization using  $\omega$ B97XD/6-31+G(d,p)[SDD]

- Energy = -1185.743781 au
- Zero-point energy correction = 0.217166 au
- Thermal correction to Gibbs free energy = 0.174572 au

Single point energy using  $\omega$ B97XD/6-311++G(2df,2p)[SDD]

- Energy = -1185.89687 au

### (6) Product of PdSCS

|    |             |             |             |
|----|-------------|-------------|-------------|
| C  | -4.07642800 | -0.00003400 | 0.00000100  |
| C  | -1.27205200 | -0.00001100 | -0.00000400 |
| C  | -1.98494400 | 1.21017100  | -0.04127900 |
| C  | -3.38097700 | 1.20672600  | -0.02559300 |
| Pd | 0.71773600  | 0.00000700  | -0.00000400 |
| C  | -3.38095700 | -1.20678100 | 0.02559300  |
| C  | -1.98492400 | -1.21020400 | 0.04127600  |



|    |             |             |             |
|----|-------------|-------------|-------------|
| C  | -1.20555700 | -2.49545100 | 0.14926100  |
| C  | 1.52804300  | -3.20983900 | 0.49420100  |
| C  | -1.20559800 | 2.49543100  | -0.14926300 |
| C  | 1.52798200  | 3.20989600  | -0.49417100 |
| H  | -1.69562900 | 3.33331900  | 0.35367300  |
| H  | -1.04772500 | 2.76254400  | -1.19940200 |
| H  | -3.92848700 | 2.14582700  | -0.04319600 |
| H  | -1.04768400 | -2.76256400 | 1.19940000  |
| H  | -1.69557300 | -3.33334700 | -0.35367800 |
| H  | -3.92845200 | -2.14589100 | 0.04319900  |
| H  | -5.16187200 | -0.00004200 | 0.00000200  |
| H  | 2.55155700  | 2.92763800  | -0.24112600 |
| H  | 1.34226700  | 2.96242300  | -1.54027900 |
| H  | 1.36533400  | 4.27294500  | -0.30670000 |
| H  | 1.34221800  | -2.96245100 | 1.54030900  |
| H  | 1.36553200  | -4.27289400 | 0.30665000  |
| H  | 2.55160400  | -2.92743800 | 0.24125400  |
| Cl | 3.11347000  | 0.00000500  | -0.00000700 |
| S  | 0.45797500  | -2.22989200 | -0.58982900 |
| S  | 0.45793500  | 2.22989900  | 0.58983500  |

Optimization using  $\omega$ B97XD/6-31+G(d,p)[SDD]

- Energy = -1773.311126 au
- Zero-point energy correction = 0.209679 au
- Thermal correction to Gibbs free energy = 0.166359 au

Single point energy using  $\omega$ B97XD/6-311++G(2df,2p)[SDD]

- Energy = -1773.5106985 au

### (7) Ligand of PdPCP

|   |             |             |             |
|---|-------------|-------------|-------------|
| C | 0.04745200  | -0.11931600 | -0.04308200 |
| C | -0.04222700 | 2.60716900  | 0.43447000  |
| C | -1.08499800 | 0.42636400  | 0.56994300  |
| C | -1.11907600 | 1.80282100  | 0.80281800  |
| C | 1.07791200  | 2.04793900  | -0.17014500 |
| C | 1.13399900  | 0.67196800  | -0.41930000 |
| C | -2.25719000 | -0.44945700 | 0.92854100  |
| C | -4.71482000 | -1.69068400 | 0.28684000  |
| C | -3.99636400 | 0.73275200  | -0.97729700 |
| C | 2.35621700  | 0.04953700  | -1.04137200 |
| C | 4.88110100  | -1.19801700 | -0.82012200 |
| C | 3.04205300  | -1.37092300 | 1.32098500  |
| H | -1.99148200 | 2.24681300  | 1.27498700  |
| H | -0.07848100 | 3.67605600  | 0.62205700  |
| H | 1.91867600  | 2.67806600  | -0.44739100 |
| H | -1.90969900 | -1.38397700 | 1.38360900  |
| H | -2.90098700 | 0.05313500  | 1.66071400  |
| H | -5.13523900 | -1.03537500 | 1.05854000  |

|   |             |             |             |
|---|-------------|-------------|-------------|
| H | -4.41088200 | -2.63316100 | 0.75189800  |
| H | -5.49652700 | -1.91780600 | -0.44392700 |
| H | -4.46870300 | 1.19840200  | -0.10409100 |
| H | -4.74715200 | 0.61879400  | -1.76463800 |
| H | -3.21353200 | 1.39891400  | -1.35023900 |
| H | 2.71975200  | 0.66928000  | -1.86879900 |
| H | 2.11546500  | -0.93844000 | -1.45219000 |
| H | 4.36364000  | -2.08844100 | -1.19561100 |
| H | 5.72726200  | -1.51820000 | -0.20499200 |
| H | 5.28186100  | -0.63911000 | -1.67096900 |
| H | 2.66303500  | -2.24802900 | 0.78309200  |
| H | 2.21978600  | -0.92386500 | 1.88650100  |
| H | 3.80463200  | -1.69700900 | 2.03413600  |
| H | 0.07825400  | -1.18970700 | -0.23696500 |
| P | -3.26594800 | -0.92111800 | -0.57718000 |
| P | 3.76701300  | -0.10470000 | 0.18055400  |

Optimization using  $\omega$ B97XD/6-31+G(d,p)[SDD]

- Energy = -1151.9047895 au
- Zero-point energy correction = 0.291707 au
- Thermal correction to Gibbs free energy = 0.244710 au

Single point energy using  $\omega$ B97XD/6-311++G(2df,2p)[SDD]

- Energy = -1152.0721151 au

### (8) Product of PdPCP

|    |             |             |             |
|----|-------------|-------------|-------------|
| Pd | 0.00000600  | -0.71509500 | 0.00001100  |
| P  | -2.26827700 | -0.41773400 | -0.02909000 |
| P  | 2.26828300  | -0.41769700 | 0.02911300  |
| Cl | 0.00003000  | -3.10803900 | -0.00004900 |
| C  | -0.00001100 | 1.31704800  | -0.00000300 |
| C  | 1.17807900  | 2.04481000  | -0.28500200 |
| C  | 1.17182500  | 3.44176400  | -0.27381900 |
| C  | -0.00003600 | 4.14070900  | -0.00002600 |
| C  | -1.17188500 | 3.44174800  | 0.27378100  |
| C  | -1.17811400 | 2.04479500  | 0.28498800  |
| C  | -2.44506800 | 1.29128100  | 0.63684900  |
| C  | 2.44504800  | 1.29131400  | -0.63684500 |
| H  | -2.54053700 | 1.20077500  | 1.72639500  |
| H  | -3.34886800 | 1.79094400  | 0.27014600  |
| H  | 2.54052600  | 1.20079500  | -1.72639000 |
| H  | 3.34883800  | 1.79099700  | -0.27014400 |
| H  | 2.08789600  | 3.98657100  | -0.48959800 |
| H  | -0.00004600 | 5.22654500  | -0.00003600 |
| H  | -2.08796500 | 3.98654300  | 0.48955100  |
| C  | 3.02925400  | -0.36942300 | 1.69067400  |
| H  | 2.51513600  | 0.38529800  | 2.29076300  |
| H  | 2.89772200  | -1.34261000 | 2.17000500  |

|   |             |             |             |
|---|-------------|-------------|-------------|
| H | 4.09554000  | -0.12959600 | 1.63286000  |
| C | 3.36666100  | -1.49987200 | -0.94479000 |
| H | 4.41320800  | -1.18930300 | -0.86907700 |
| H | 3.25178700  | -2.52193000 | -0.57443800 |
| H | 3.05054000  | -1.48631400 | -1.99047800 |
| C | -3.02924900 | -0.36949000 | -1.69065100 |
| H | -2.89770300 | -1.34267900 | -2.16997100 |
| H | -4.09553900 | -0.12967700 | -1.63284000 |
| H | -2.51514300 | 0.38523300  | -2.29074800 |
| C | -3.36663800 | -1.49991600 | 0.94482400  |
| H | -4.41318900 | -1.18935600 | 0.86911600  |
| H | -3.25175800 | -2.52197400 | 0.57447400  |
| H | -3.05051200 | -1.48635200 | 1.99051000  |

Optimization using  $\omega$ B97XD/6-31+G(d,p)[SDD]

- Energy = -1739.5104236 au
- Zero-point energy correction = 0.283525 au
- Thermal correction to Gibbs free energy = 0.234836 au

Single point energy using  $\omega$ B97XD/6-311++G(2df,2p)[SDD]

- Energy = -1739.7244846 au
